# Supplementary material for: Chromium doping enabled improvement in alkaline seawater oxidation over cobalt carbonate hydroxide nanowire array
Source: Royal Society of Chemistry journal article supplement (doi:10.1039/d3cc02667a), 2023-01-01
Supplement: d3cc02667a1.pdf [file d3cc02667a1.pdf]

## Electronic Supplementary Information

### Experimental section

**Materials:** Chromium nitrate nonahydrate ( $\text{Cr}(\text{NO}_3)_3 \cdot 9\text{H}_2\text{O}$ ), cobalt nitrate hexahydrate ( $\text{Co}(\text{NO}_3)_2 \cdot 6\text{H}_2\text{O}$ ), urea, sodium chloride ( $\text{NaCl}$ ), sodium carbonate ( $\text{Na}_2\text{CO}_3$ ), ruthenium oxide ( $\text{RuO}_2$ ), and nafion (5 wt.%) were bought from Aladdin Ltd. (Shanghai, China). Disodium phosphate anhydrous ( $\text{Na}_2\text{HPO}_4$ ), potassium phosphate monobasic ( $\text{KH}_2\text{PO}_4$ ), ethylenediaminetetraacetic acid disodium, potassium hydroxide ( $\text{KOH}$ ), sodium hydroxide ( $\text{NaOH}$ ), and N, N-diethyl-p-phenylenediamine (DPD) were obtained from Shanghai Maclin Biochemical Technology Co., Ltd. Acetone, ethanol, potassium permanganate ( $\text{KMnO}_4$ ), sulfuric acid ( $\text{H}_2\text{SO}_4$ ), and hydrochloric acid ( $\text{HCl}$ ) were purchased from Beijing Chemical Reagent Co. Ltd (Beijing, China). Natural seawater was collected from Qingdao, Shandong, China, and most of the magnesium and calcium salts were removed by adding  $\text{Na}_2\text{CO}_3$  in natural seawater before use. Ni foam (NF) was obtained from Shenzhen Green and Creative Environmental Science and Technology Co. Ltd. Ultrapure water was used throughout.

**Preparation of Cr-CoCH/NF:** Firstly, NF ( $2.0 \times 3.0 \text{ cm}^2$ ) was sonicated in  $\text{HCl}$ , ethanol, and water for 10 min, respectively. The pretreated NF was put into a solution containing 2 mmol  $\text{Co}(\text{NO}_3)_2 \cdot 6\text{H}_2\text{O}$ , 10 mmol urea, and 35 mL water in a Teflon-lined autoclave and heated at  $120^\circ\text{C}$  for 6 h to get CoCH/NF. The obtained CoCH/NF was then immersed in 0.01 M  $\text{Cr}(\text{NO}_3)_3$  for 6 h. The above sample was finally taken out, washed with water, and dried at  $60^\circ\text{C}$  for 2 h to obtain Cr-CoCH/NF.

**Preparation of  $\text{RuO}_2$  on NF:** 5 mg  $\text{RuO}_2$  was added in a solution containing 30  $\mu\text{L}$  of nafion, 485  $\mu\text{L}$  of ethanol, and 485  $\mu\text{L}$  of water with the aid of ultrasonication (30 min) to form a homogeneous ink ( $5 \text{ mg mL}^{-1}$ ). 370  $\mu\text{L}$  of catalyst ink was then dropped onto a piece of cleaned NF ( $0.5 \times 0.5 \text{ cm}^2$ ) with a loading mass of  $1.85 \text{ mg cm}^{-2}$ .

**Characterizations:** XRD data were obtained via X-ray diffraction (XRD, Philip D8). Scanning electron microscopy (SEM, ZISS 300) equipped with an energy dispersive X-ray (EDX) facility, transmission electron microscopy (TEM, JEM-F200, JEOL Ltd.),

and X-ray photoelectron spectroscopy (XPS, ESCALAB 250 Xi) were utilized to research the morphology and compositions of samples. Inductive Coupled Plasma Emission Spectrometer (ICP-AES) (iCAD7400) were applied to study element content of sample. Absorbance data were acquired on UV-vis spectrophotometer (Shimadzu UV-2700).

**Electrochemical measurements:** Electrochemical OER tests were performed with a CHI 660E electrochemical workstation, using the prepared electrodes ( $0.5 \times 0.5 \text{ cm}^2$ ), carbon rod, and Hg/HgO as the working electrode, counter electrode, and reference electrode, respectively. Three different electrolytes, including 1 M KOH, 1 M KOH + 0.5 M NaCl, and 1 M KOH + Seawater were used, and the pH was about 14.0. All measured potentials were referenced to that of reversible hydrogen electrode (RHE) ( $E_{\text{RHE}} = E_{\text{Hg/HgO}} + 0.059 \times \text{pH} + 0.098 \text{ V}$ ). The Tafel slope is calculated according to the Tafel equation as follows:  $\eta = b \log j + a$ , where  $\eta$  is overpotential,  $j$  is the current density ( $\text{mA cm}^{-2}$ ), and  $b$  is the Tafel slope ( $\text{mV dec}^{-1}$ ). Electrochemical impedance spectroscopy measurements were performed between 100000 to 0.01 Hz with an amplitude of 5 mV. The catalytic activity of catalysts was determined by linear sweep voltammetry (LSV) curves with a scan rate of  $2 \text{ mV s}^{-1}$ . The double-layer capacitance ( $C_{\text{dl}}$ ) values were obtained via cyclic voltammetry (CV) curves with the scan rates of 20–100  $\text{mV s}^{-1}$ . All data (except for Figs. 3e, 4c, and S8) have been reported with 85% iR compensation.

**Determination of active chlorine:** The concentration of active chlorine in the electrolyte was determined based on DPD colorimetric method using a UV-vis spectrophotometer. DPD was added to the electrolyte solution after electrolysis at  $500 \text{ mA cm}^{-2}$  for 12 h, and the electrolyte solution became pink. The absorbance at 550 nm was measured by UV-visible absorption spectroscopy, and the concentration of different active chlorine were also analyzed.

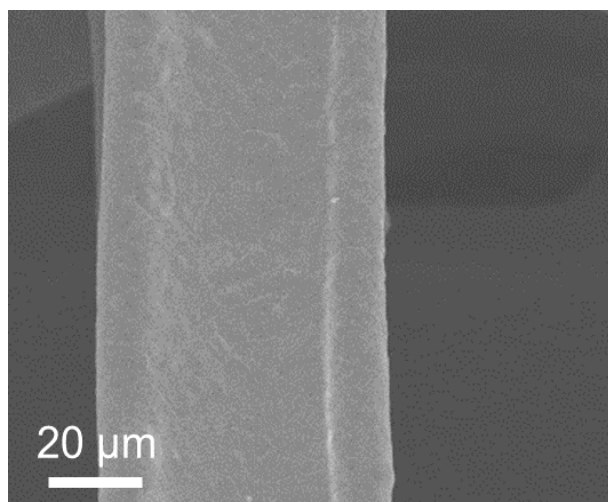

**Fig. S1.** SEM image of NF.

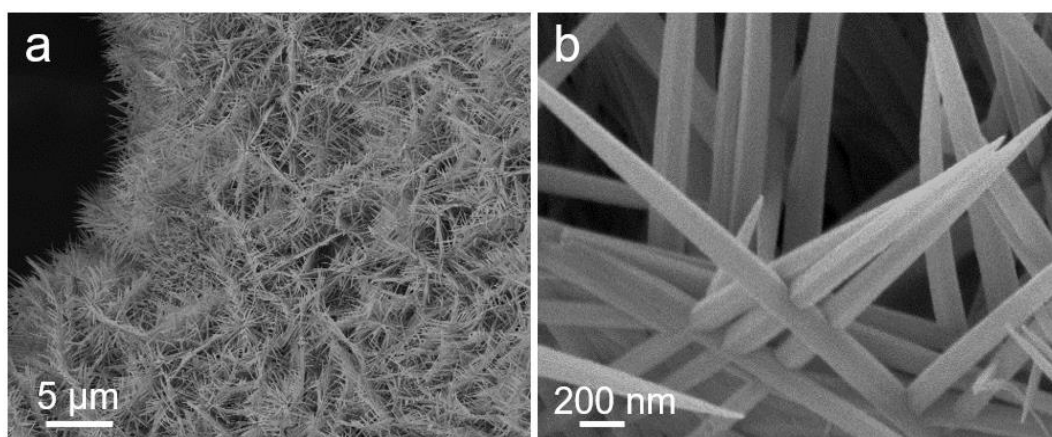

**Fig. S2.** (a) Low- and (b) high-magnification SEM images of CoCH/NF.

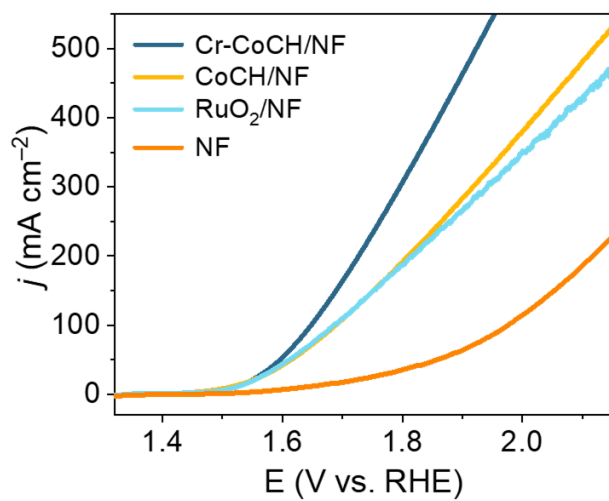

**Fig. S3.** LSV curves of different catalysts without iR compensation in 1 M KOH.

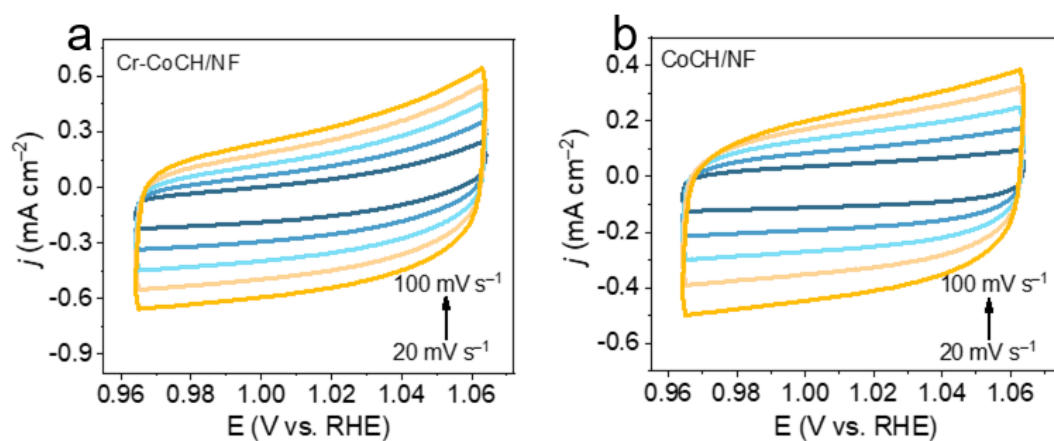

**Fig. S4.** CV curves of (a) Cr-CoCH/NF and (b) CoCH/NF in the double layer region at different scan rates of 20, 40, 60, 80 and 100 mV s<sup>-1</sup> in 1 M KOH.

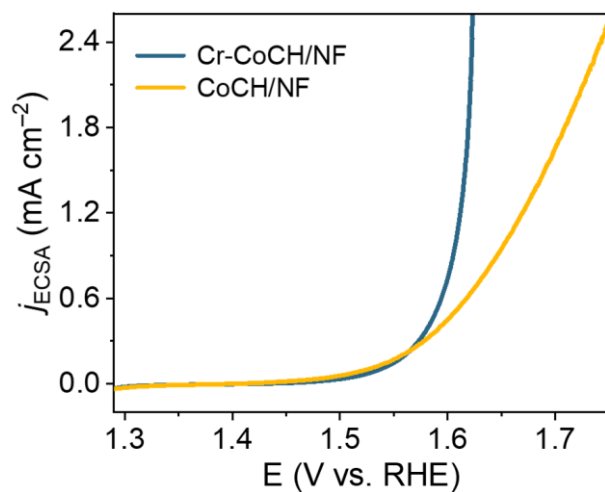

**Fig. S5.** LSV curves in 1 M KOH for Cr-CoCH/NF and CoCH/NF normalized by the electrochemical active surface area.

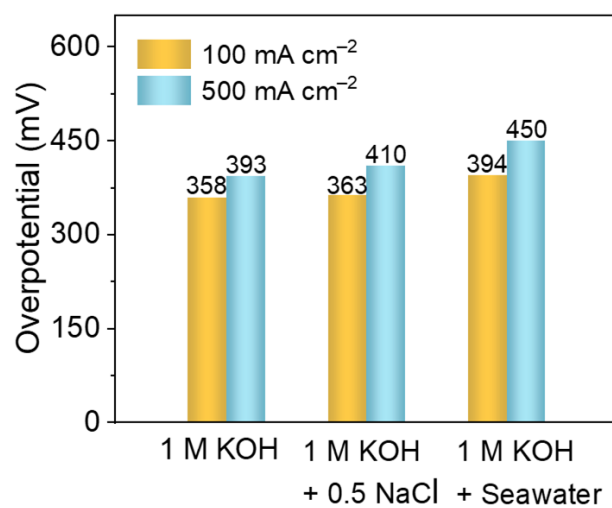

**Fig. S6.** The corresponding overpotentials of Cr-CoCH/NF tested in different electrolytes.

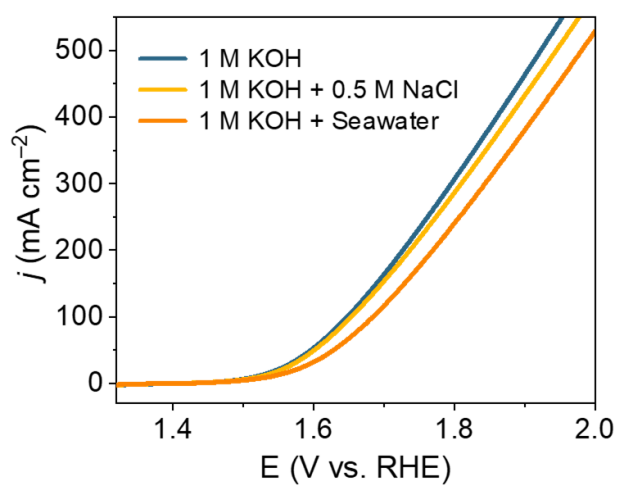

**Fig. S7.** LSV curves of Cr-CoCH/NF without iR compensation in different electrolytes.

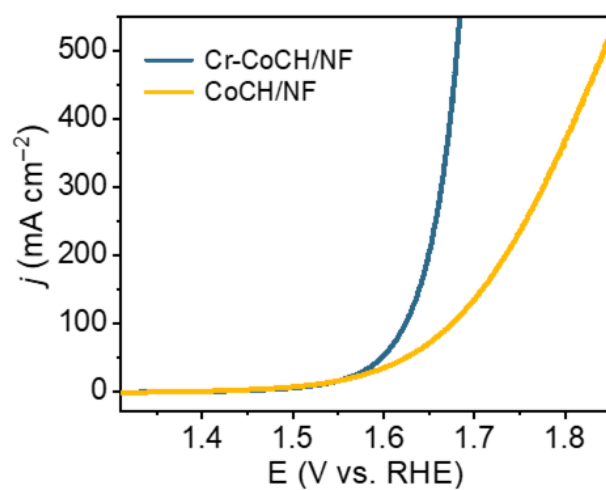

**Fig. S8.** LSV curves of Cr-CoCH/NF and CoCH/NF in 1 M KOH + Seawater.

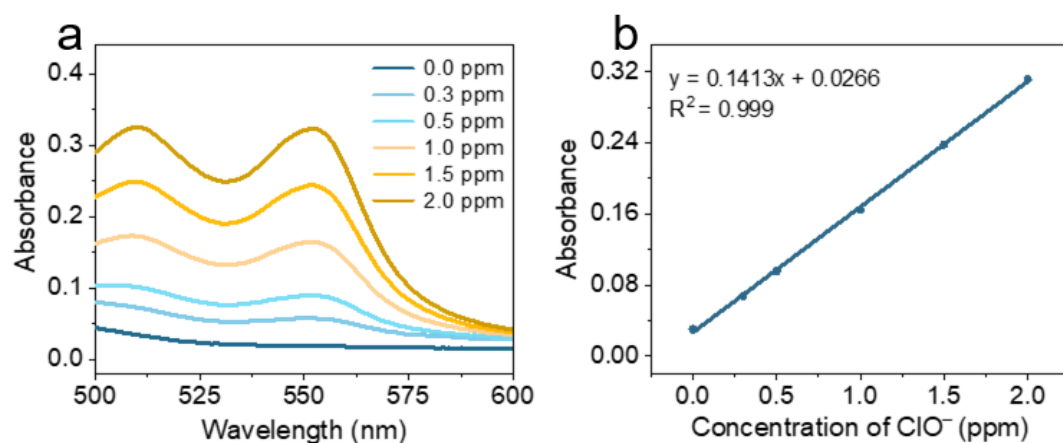

**Fig. S9.** (a) UV-vis absorption spectra of various active chlorine concentrations. (b) Calibration curve was used to evaluate  $\text{ClO}^-$  concentrations of the electrolyte.

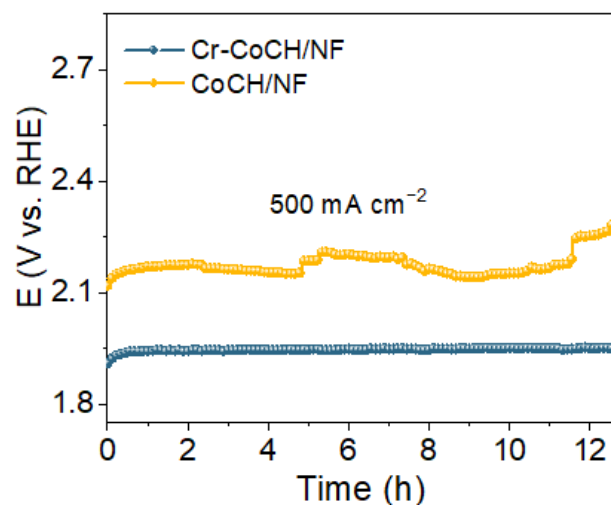

**Fig. S10.** Chronopotentiometry curves of Cr-CoCH/NF and CoCH/NF at a  $j$  of 500  $\text{mA cm}^{-2}$  without iR compensation in 1 M KOH + Seawater.

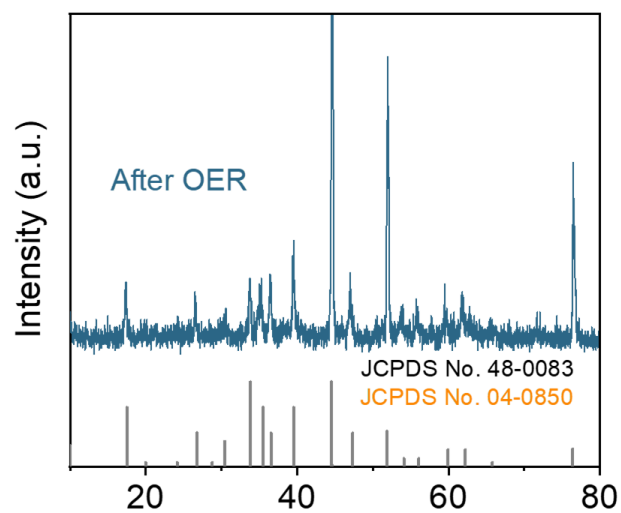

**Fig. S11.** XRD pattern of Cr-CoCH/NF after stability test in 1 M KOH + Seawater.

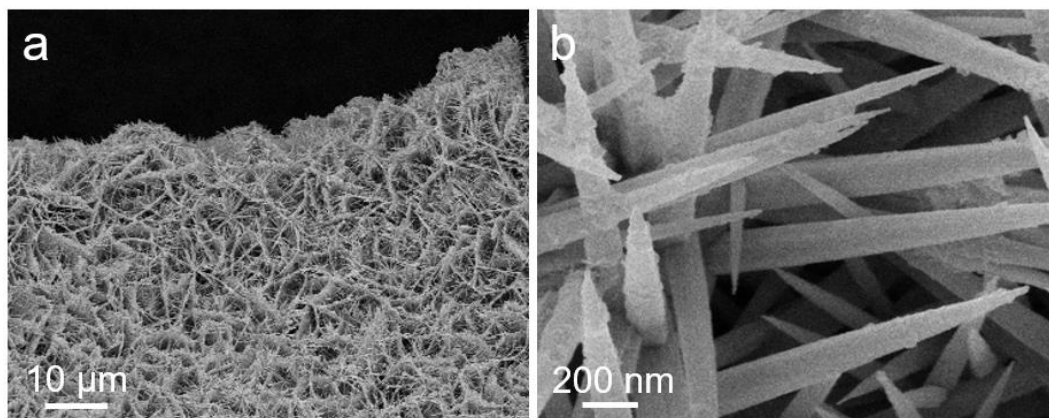

**Fig. S12.** (a) Low- and (b) high-magnification SEM images of Cr-CoCH/NF after stability test in 1 M KOH + Seawater.

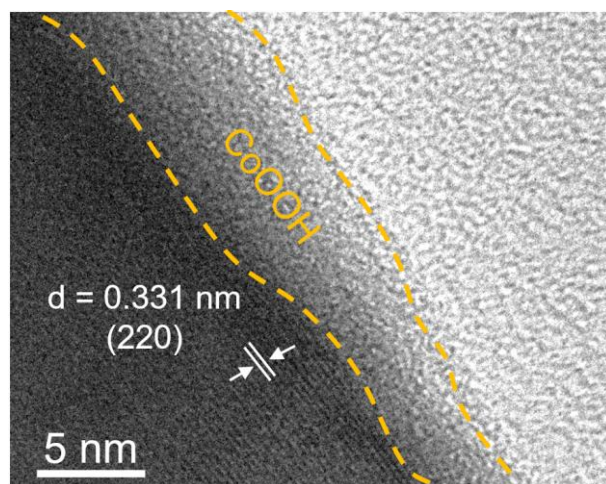

**Fig. S13.** HRTEM image of Cr-CoCH after stability test in 1 M KOH + Seawater.

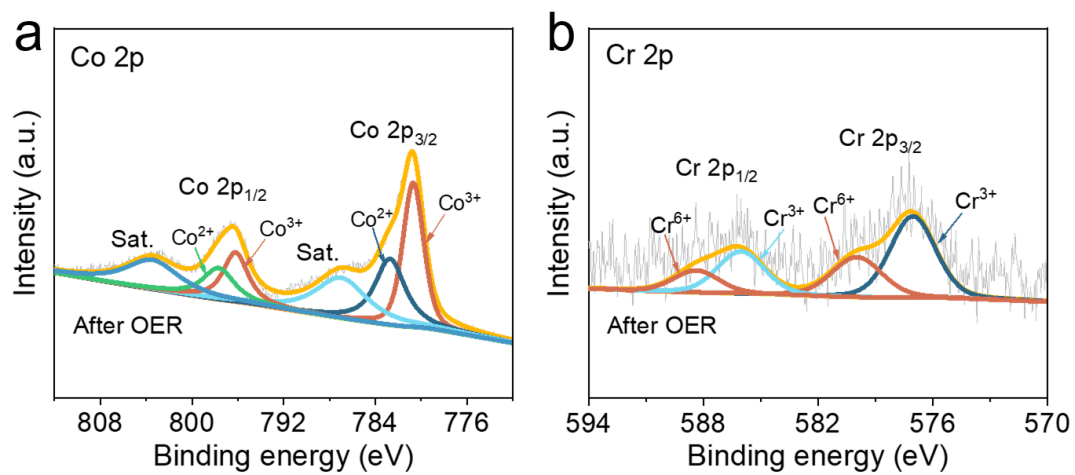

**Fig. S14.** High-resolution XPS spectra for Cr-CoCH in the (a) Co 2p and (b) Cr 2p regions after stability test in 1 M KOH + Seawater.

**Table S1.** Element analysis of Fe-CoCH/NF by ICP-AES.

| Element                      | Cr    | Co   |
|------------------------------|-------|------|
| Element concentration (mg/L) | 5.29  | 0.71 |
| wt. (%)                      | 31.12 | 4.18 |

**Table S2.** Comparison of the OER performance of Cr-CoCH/NF with other reported seawater OER electrocatalysts.

| Catalysts                                                      | Electrolyte                   | Current Density<br>(mA cm <sup>-2</sup> ) | Overpotential<br>(mV) | Ref.             |
|----------------------------------------------------------------|-------------------------------|-------------------------------------------|-----------------------|------------------|
| <b>Cr-CoCH/NF</b>                                              | <b>1 M KOH +<br/>seawater</b> | <b>100<br/>500</b>                        | <b>394<br/>450</b>    | <b>This work</b> |
| Ag <sub>2</sub> Se-Ag <sub>2</sub> S-CoCH/NF                   | 1 M KOH +<br>seawater         | 50<br>100                                 | 380<br>474            | 1                |
| Cr-Co <sub>x</sub> P                                           | 1 M KOH +<br>seawater         | 100<br>500                                | 334<br>392            | 2                |
| CoCrV LTHs                                                     | 1 M KOH +<br>seawater         | 100                                       | 395                   | 3                |
| Co <sub>3</sub> O <sub>4</sub>                                 | 0.1 M KOH +                   | 10                                        | 503                   | 4                |
| Co <sub>3</sub> S <sub>4</sub>                                 | 0.6 M NaCl                    |                                           | 366                   |                  |
| Ni <sub>3</sub> S <sub>2</sub> /Co <sub>3</sub> S <sub>4</sub> | 1 M KOH +<br>seawater         | 100<br>500                                | 360<br>440            | 5                |
| Co-Fe LDH                                                      | 1 M KOH +<br>seawater         | 10                                        | 530                   | 6                |
| Co <sub>3</sub> O <sub>4</sub> -Mn <sub>2</sub> O <sub>3</sub> | 1 M KOH +<br>seawater         | 10                                        | 500                   | 7                |
| Fe-Co-S/Cu <sub>2</sub> O/Cu                                   | 1 M KOH +<br>seawater         | 100<br>200                                | 440<br>520            | 8                |
| MoN-Co <sub>2</sub> N NSs                                      | 1 M KOH +<br>seawater         | 100<br>500                                | 357<br>432            | 9                |
| NiCoHPi@Ni <sub>3</sub> N/NF                                   | 1 M KOH +<br>seawater         | 100<br>500                                | 396<br>474            | 10               |
| Co-N <sub>x</sub> P-HCS                                        | 1 M KOH +<br>seawater         | 100                                       | 490                   | 11               |
| CoSe <sub>2</sub> -NCF                                         | 1 M KOH +<br>seawater         | 10<br>100                                 | 245<br>455            | 12               |
| CoP <sub>x</sub> @FeOOH                                        | 1 M KOH +<br>seawater         | 100<br>500                                | 283<br>337            | 13               |
| Co-Fe-O-B                                                      | 1 M KOH +<br>0.5 M NaCl       | 100                                       | 434                   | 14               |
| Ni(OH) <sub>2</sub> -TCNQ/GP                                   | 1 M KOH +<br>seawater         | 100<br>500                                | 382<br>542            | 15               |

## References

- 1 L. Yang, C. Feng, C. Guan, L. Zhu and D. Xia, *Appl. Surf. Sci.*, 2023, **607**, 154885.
- 2 Y. Song, M. Sun, S. Zhang, X. Zhang, P. Yi, J. Liu, B. Huang, M. Huang and L. Zhang, *Adv. Funct. Mater.*, 2023, 2214081.
- 3 S. Khatun and P. Roy, *Chem. Commun.*, 2022, **58**, 1104–1107.
- 4 J. Li, F. Xu, K. Wang, J. He, Y. Wang, L. Lei, M. Zhu, L. Zhuang and Z. Xu, *Chem. Eng. Sci.*, 2023, **267**, 118366.
- 5 C. Wang, M. Zhu, Z. Cao, P. Zhu, Y. Cao, X. Xu, C. Xu and Z. Yin, *Appl. Catal. B-Environ.*, 2021, **291**, 120071.
- 6 F. Cheng, X. Feng, X. Chen, W. Lin, J. Rong and W. Yang, *Electrochim. Acta*, 2017, **251**, 336–343.
- 7 L. Bigiani, D. Barreca, A. Gasparotto, T. Andreu, J. Verbeeck, C. Sada, E. Modin, O. I. Lebedev, J. R. Morante and C. Maccato, *Appl. Catal. B-Environ.*, 2021, **284**, 119684.
- 8 J. Sun, P. Song, H. Zhou, L. Lang, X. Shen, Y. Liu, X. Cheng, X. Fu and G. Zhu, *Appl. Surf. Sci.*, 2021, **567**, 150757.
- 9 X. Wang, X. Han, R. Du, C. Xing, X. Qi, Z. Liang, P. Guardia, J. Arbiol, A. Cabot and J. Li, *ACS Appl. Mater. Interfaces*, 2022, **14**, 41924–41933.
- 10 H. Sun, J. Sun, Y. Song, Y. Zhang, Y. Qiu, M. Sun, X. Tian, C. Li, Z. Lv and L. Zhang, *ACS Appl. Mater. Interfaces*, 2022, **14**, 22061–22070.
- 11 X. Wang, X. Zhou, C. Li, H. Yao, C. Zhang, J. Zhou, R. Xu, L. Chu, H. Wang, M. Gu, H. Jiang and M. Huang, *Adv. Mater.*, 2022, **34**, 2204021.
- 12 H. Chen, S. Zhang, Q. Liu, P. Yu, J. Luo, G. Hu and X. Liu, *Inorg. Chem. Commun.*, 2022, **146**, 110170.
- 13 L. Wu, L. Yu, B. McElhenny, X. Xing, D. Luo, F. Zhang, J. Bao, S. Chen and Z. Ren, *Appl. Catal. B-Environ.*, 2021, **294**, 120256.
- 14 S. Gupta, M. Forster, A. Yadav, A. J. Cowan, N. Patel and M. Patel, *ACS Appl. Energy Mater.*, 2020, **3**, 7619–7628.

- 15 L. Zhang, J. Wang, P. Liu, J. Liang, Y. Luo, G. Cui, B. Tang, Q. Liu, X. Yan, H. Hao, M. Liu, R. Gao and X. Sun, *Nano Res.*, 2022, **15**, 6084–6090.
